# Supplementary material for: Design of organic structure directing agents to guide the synthesis of zeolites for the separation of ethylene–ethane mixtures
Source: Royal Society of Chemistry journal article supplement (doi:10.1039/d0ra02896g), 2020-01-01
Supplement: d0ra02896g5.pdf [file d0ra02896g5.pdf]

## Supporting Information

*Table SI 1: Design runs for DFT. The columns contain an identifier for the run, the number of OSDA copies fitted into the zeolite, the reference to the reagent database used for the run, the number of MD calculations performed during the run, the number of generated OSDAs with a negative stabilization energy, the number of generated OSDAs with a stabilization energy within 2 kJ/(mol Si) from the most favorably scoring OSDA in each run, and the name, stabilization energy, and 2D structure of the most favorably scoring OSDA. For the DFT 1 and DFT 7 design runs, the requirement that a positive charge center be present in the OSDA was dropped. All molecules in the other design runs did have a positive charge center.*

| DFT run             | OSDAs | shelf | MD    | Number <0 | Number within 2 kJ/(mol Si) | Best                                                                                                                        |
|---------------------|-------|-------|-------|-----------|-----------------------------|-----------------------------------------------------------------------------------------------------------------------------|
| DFT 1a<br>uncharged | 1     | MS10  | 11229 | 919       | 5                           | Syn030205<br>-15.3 kJ/(mol Si)<br><br>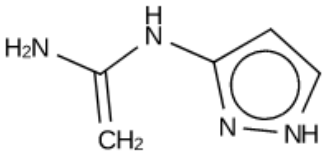   |
| DFT 1b<br>uncharged | 1     | MS10  | 10215 | 847       | 9                           | Syn101567<br>-14.4 kJ/(mol Si)<br><br> |
| DFT 1c<br>uncharged | 1     | MS10  | 10985 | 951       | 16                          | Syn102867<br>-13.9 kJ/(mol Si)<br><br> |

| DFT run        | OSDAs | shelf  | MD   | Number <0 | Number within 2 kJ/(mol Si) | Best                                                                                                                       |
|----------------|-------|--------|------|-----------|-----------------------------|----------------------------------------------------------------------------------------------------------------------------|
| DFT 2a charged | 1     | MS10   | 3954 | 3         | 3                           | Syn145277<br>-1.7 kJ/(mol Si)<br><br>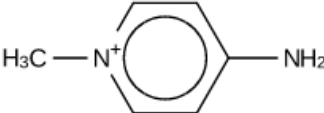   |
| DFT 2b charged | 1     | MS10   | 8616 | 11        | 2                           | Syn031296<br>-3.5 kJ/(mol Si)<br><br>   |
| DFT 3 charged  | 1     | ntor_1 | 2732 | 5         | 4                           | Syn008292<br>-2.1 kJ/(mol Si)<br><br> |
| DFT 4 charged  | 1     | MS05   | 1252 | 37        | 37                          | Syn032690<br>-2.1 kJ/(mol Si)<br><br> |

| DFT run          | OSDAs | shelf | MD   | Number <0 | Number within 2 kJ/(mol Si) | Best                                                                                                                  |
|------------------|-------|-------|------|-----------|-----------------------------|-----------------------------------------------------------------------------------------------------------------------|
| DFT 5 charged    | 3     | MS10  | 6002 | 7         | 3                           | Syn066720<br>-2.7 kJ/(mol Si)<br>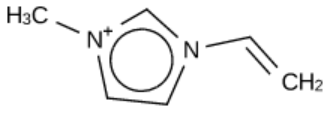  |
| DFT 6 charged    | 4     | MS10  | 4275 | 2         | 2                           | Syn027565<br>-1.5 kJ/(mol Si)<br>  |
| DFT 7a uncharged | 1     | CS100 | 3974 | 107       | 4                           | Syn007797<br>-9.5 kJ/(molSi)<br> |
| DFT 7b uncharged | 1     | CS100 | 3541 | 97        | 4                           | Syn052193<br>-9.4 kJ/(molSi)<br> |

Table SI 2: Design runs for ACO. The columns contain an identifier for the run, the number of OSDA copies fitted into the zeolite, the reference to the reagent database used for the run, the number of MD calculations performed during the run, the number of generated OSDAs with a negative stabilization energy, the number of generated OSDAs with a stabilization energy within 2

*kJ/(mol Si) from the most favorably scoring OSDA in each run, and the name, stabilization energy, and 2D structure of the most favorably scoring OSDA.*

| ACO run | OSDAs | shelf | MD   | Number <0 | Number within 2 kJ/(mol Si) | Best                              |
|---------|-------|-------|------|-----------|-----------------------------|-----------------------------------|
| ACO 1a  | 1     | MS10  | 6963 | 128       | 2                           | Syn050674<br>-7.4 kJ/(mol Si)<br> |
| ACO 1b  | 1     | MS10  | 6858 | 137       | 1                           | Syn080488<br>-7.7 kJ/(mol Si)<br> |
| ACO 1c  | 1     | MS10  | 6755 | 146       | 2                           | Syn030403<br>-7.9 kJ/(mol Si)<br> |

| ACO run | OSDAs | shelf | MD   | Number <0 | Number within 2 kJ/(mol Si) | Best                                                                                                                  |
|---------|-------|-------|------|-----------|-----------------------------|-----------------------------------------------------------------------------------------------------------------------|
| ACO 1d  | 1     | MS10  | 6546 | 132       | 4                           | Syn083813<br>-7.2 kJ/(mol Si)<br>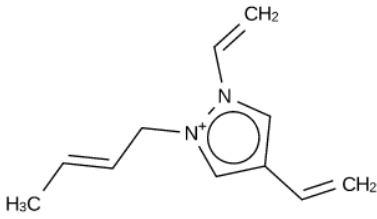   |
| ACO 1e  | 1     | MS10  | 7192 | 123       | 9                           | Syn061370<br>-6.0 kJ/(mol Si)<br>   |
| ACO 1f  | 1     | MS10  | 6667 | 129       | 1                           | Syn024815<br>-7.1 kJ/(mol Si)<br> |

*Table SI 3: Design runs for NAT. The columns contain an identifier for the run, the number of OSDA copies fitted into the zeolite, the reference to the reagent database used for the run, the number of MD calculations performed during the run, the number of generated OSDAs with a negative stabilization energy, the number of generated OSDAs with a stabilization energy within 2 kJ/(mol Si) from the most favorably scoring OSDA, and the name, stabilization energy, and 2D structure of the most favorably scoring OSDA in each run. The first column also indicates which zeolite symmetry is used, and whether the OSDA are charged or uncharged.*

| NAT run | OSDAs | shelf | MD | Number <0 | Number within 2 kJ/(mol Si) | Best |
|---------|-------|-------|----|-----------|-----------------------------|------|
|---------|-------|-------|----|-----------|-----------------------------|------|

| NAT run                   | OSDAs | shelf | MD   | Number <0 | Number within 2 kJ/(mol Si) | Best                                                                                                                        |
|---------------------------|-------|-------|------|-----------|-----------------------------|-----------------------------------------------------------------------------------------------------------------------------|
| NAT 1a<br>P1<br>uncharged | 4     | MS10  | 6185 | 782       | 10                          | Syn044841<br>-20.5 kJ/(mol Si)<br><br>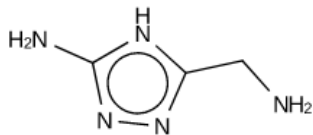   |
| NAT 1b<br>P1<br>uncharged | 4     | MS10  | 6152 | 808       | 6                           | Syn123042<br>-21.5 kJ/(mol Si)<br><br>   |
| NAT 1c<br>P1<br>uncharged | 4     | MS10  | 5990 | 813       | 9                           | Syn020634<br>-20.4 kJ/(mol Si)<br><br> |
| NAT_2a<br>charged         | 1     | MS10  | 7070 | 25        | 25                          | Syn125615<br>-1.3 kJ/(mol Si)<br><br>  |
| NAT_2b<br>charged         | 1     | MS10  | 6190 | 37        | 21                          | Syn010154<br>-1.3 kJ/(mol Si)<br><br>  |

| NAT run                   | OSDAs | shelf | MD    | Number <0 | Number within 2 kJ/(mol Si) | Best                                                                                                                       |
|---------------------------|-------|-------|-------|-----------|-----------------------------|----------------------------------------------------------------------------------------------------------------------------|
| NAT_2c<br>charged         | 1     | MS10  | 6684  | 17        | 17                          | Syn070894<br>-1.3 kJ/(mol Si)<br><br>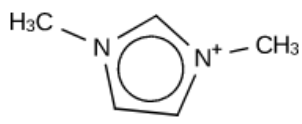   |
| NAT_3a<br>charged         | 2     | MS10  | 6592  | 4         | 4                           | Syn157731<br>-2.1 kJ/(mol Si)<br><br>   |
| NAT_4a<br>P1<br>charged   | 1     | MS10  | 7079  | 22        | 22                          | Syn061573<br>-1.7 kJ/(mol Si)<br><br> |
| NAT_4b<br>P1<br>charged   | 1     | MS10  | 7149  | 25        | 25                          | Syn018329<br>-1.2 kJ/(mol Si)<br><br> |
| NAT_5a<br>P1<br>uncharged | 1     | MS10  | 15106 | 1774      | 128                         | Syn004462<br>-5.5 kJ/(mol Si)<br><br> |

| NAT run                   | OSDAs | shelf | MD    | Number <0 | Number within 2 kJ/(mol Si) | Best                                                                                                                    |
|---------------------------|-------|-------|-------|-----------|-----------------------------|-------------------------------------------------------------------------------------------------------------------------|
| NAT_5b<br>P1<br>uncharged | 1     | MS10  | 14755 | 1738      | 124                         | Syn050548<br>-5.6 kJ/(mol Si)<br>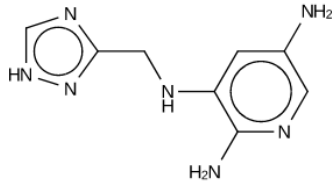    |
| NAT_5c<br>P1<br>uncharged | 1     | MS10  | 14058 | 1656      | 194                         | Syn047941<br>-5.2 kJ/(mol Si)<br>    |
| NAT_6a<br>P1<br>uncharged | 2     | MS10  | 10506 | 10506     | 1758                        | Syn010950<br>-10.9 kJ/(mol Si)<br> |
| NAT_6b<br>P1<br>uncharged | 2     | MS10  | 10225 | 10225     | 1777                        | Syn078845<br>-10.0 kJ/(mol Si)<br> |



| NAT run                   | OSDAs | shelf | MD    | Number <0 | Number within 2 kJ/(mol Si) | Best                                                                                                                      |
|---------------------------|-------|-------|-------|-----------|-----------------------------|---------------------------------------------------------------------------------------------------------------------------|
| NAT_6c<br>P1<br>uncharged | 2     | MS10  | 10643 | 10643     | 1771                        | Syn165261<br>-10.1 kJ/(mol Si)<br><br>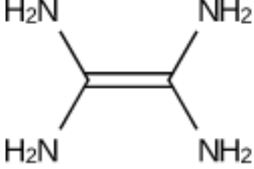 |

Table SI 4: Design runs for JRY. The columns contain an identifier for the run, the number of OSDA copies fitted into the zeolite, the reference to the reagent database used for the run, the number of MD calculations performed during the run, the number of generated OSDAs with a negative stabilization energy, the number of generated OSDAs with a stabilization energy within 2 kJ/(mol Si) from the most favorably scoring OSDA in each run, and the name, stabilization energy, and 2D structure of the most favorably scoring OSDA.

| JRY run | OSDAs | shelf | MD   | Number <0 | Number within 2 kJ/(mol Si) | Best                                                                                                                      |
|---------|-------|-------|------|-----------|-----------------------------|---------------------------------------------------------------------------------------------------------------------------|
| JRY 1a  | 2     | MS10  | 6964 | 830       | 33                          | Syn051111<br>-9.1 kJ/(mol Si)<br><br>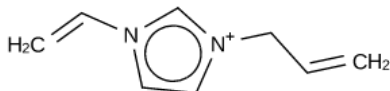 |
| JRY 1b  | 2     | MS10  | 7001 | 927       | 28                          | Syn036105<br>-9.5 kJ/(mol Si)<br><br> |

| JRY run | OSDAs | shelf | MD   | Number <0 | Number within 2 kJ/(mol Si) | Best                                                                                                                    |
|---------|-------|-------|------|-----------|-----------------------------|-------------------------------------------------------------------------------------------------------------------------|
| JRY 1c  | 2     | MS10  | 6522 | 887       | 34                          | Syn007049<br>-9.3 kJ/(mol Si)<br><br>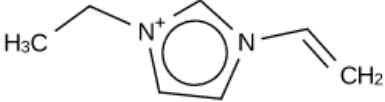 |

Table SI 5: The organic synthesis reactions used by the de novo design program to generate OSDAs.

| Mnemonic          | Reactants                   | Product                                          | Description                          |
|-------------------|-----------------------------|--------------------------------------------------|--------------------------------------|
| AMIDEFROMACID     | $R_1C=OOH, R_2NH_2$         | $R_1-NHC=O-R_2$                                  | Amide from acid and aliphatic amine  |
| REDUCECYAN        | $RC\#N$                     | $R-CN H_2$                                       | Red.Am. Fully reduce CN to amine     |
| WITTIG            | $R_1CXR_2, R_3C=OR_4$       | $R_{1,2}C=CR_{3,4}$                              | Wittig alkene synthesis              |
| NH2FROMNITRO      | $RNO_2$                     | $RNH_2$                                          | Reduce nitro group                   |
| AMINEFROMAMIDE    | $R_1C=ONR_{2,3}$            | $R_1CH_2NR_{2,3}$                                | Red.Am. Reduce amide group           |
| AMINEFROMACID     | $RC=OOH$                    | $RNH_2$                                          | Schmidt Reaction, reduce acid group  |
| AMINEFROMALDOKETO | $R_1C=OR_2$                 | $R_1CHNH_2R_2$                                   | Reductive amination from carbonyl    |
| FCACYLATION       | Aryl, $R_2C=OX$             | $Ar1C=OR_2$                                      | Friedel-Crafts acylation             |
| DEOXYALDOKETO     | $R_1C=OR_2$                 | $R_1CH_2R_2$                                     | Aldol/Ketone deoxygenation           |
| REDALDOKETO       | $R_1C=OR_2$                 | $R_1CHOHR_2$                                     | Reduction of aldol/ketone to alcohol |
| GABRIEL           | $RX$                        | $RNH_2$                                          | Alkyl-NH2 from halide                |
| ALKYNECOUPLING    | $R_1C\#CH, R_2C\#CH$        | $R_1C\#CC\#CR_2$                                 | Alkyne coupling                      |
| APPEL             | $ROH$                       | $RX$                                             | Appel reaction                       |
| BARTOLIINDOLE     | $R_1NO_2Phe, XR_2C=CR_3$    | $R_{1,2,3}$ Indole                               | Bartoli indole synthesis             |
| BUCHWALDHARTWIG   | $ArX, R_1NHR_2$             | $ArNR_{1,2}$                                     | Buchwald Hartwig coupling            |
| ALKENETOALKANE    | $R_{1,2}C=CR_{3,4}$         | $R_{1,2}CHCHR_{3,4}$                             | Reduction of alkene                  |
| COREYFUCHS        | $RHC=O$                     | $RC\equiv CH$                                    | Corey-Fuchs alkyne synthesis         |
| ALKYNETOALKENE    | $R_1C\equiv CR_2$           | $R_1HC=CHR_2$                                    | Reduction of alkyne to alkene        |
| ALKYNETOALKANE    | $R_1C\equiv CR_2$           | $R_1H_2CCH_2R_2$                                 | Reduction of alkyne to alkane        |
| ALKYNESN2         | $R_1C\equiv CH, R_2X$       | $R_1C\equiv CR_2$                                | SN2 displacement of alkyne           |
| OHTOBR            | $ROH$                       | $RBr$                                            | Bromide synthesis                    |
| OHTOI             | $ROH$                       | $RI$                                             | Iodide synthesis                     |
| BENZYLTOCHLORIDE  | $ArCH_3$                    | $ArCH_2Cl$                                       | Benzyl halogenization                |
| BENZYLTOBROMIDE   | $ArCH_3$                    | $ArCH_2Br$                                       | Benzyl halogenization                |
| HALOTOCYANIDE     | $RX$                        | $RC\equiv N$                                     | Cyanide from halide                  |
| SONOGASHIRA       | $R_1C\#CH, R_2X$            | $R_1C\#CR_2$                                     | Sonogashira coupling                 |
| LAROCKINDOLE      | $ArINHR_1, R_2C\equiv CR_3$ | $R_{1,2,3}$ indol                                | Larock indole synthesis              |
| SUZUKI            | borate, halogenide          | Alkyl/aryl <sub>1</sub> -Alkyl/aryl <sub>2</sub> | Suzuki coupling                      |
| NHALKYLATION      | aromatic N-H, $RX$          | $ArN-R, ArN = imidazole, \dots$                  | Alkylation of arom. N with Grignard  |
| FISCHERINDOLE     | Hydrazine, carbonyl         | indole                                           | Fischer indole synthesis             |
| MENSHUTKIN        | $R_1R_2R_3N, R_4X$          | Quaternary amine                                 | Menshutkin reaction                  |
| SKRAUP            | anyline with alpha-CH       | quinoline                                        | Skraup reaction                      |
| SUZUKIMIYAUURA    | 2x Alkyl/aryl -X            | Alkyl/aryl <sub>1</sub> -Alkyl/aryl <sub>2</sub> | Suzuki-Miyaura reaction              |

| <b>Mnemonic</b>  | <b>Reactants</b>           | <b>Product</b>                  | <b>Description</b>                   |
|------------------|----------------------------|---------------------------------|--------------------------------------|
| ESCHWEILERCLARKE | prim./sec. amine           | methyl-substituted amine        | Eschweiler-Clarke reaction           |
| PYRIMIDINIUM     | pyridine, SN2-halogenide   | pyrimidinium cation             | alkylated pyridine (pyridinium ion)  |
| ALKYLATEN        | amine, MeI or EtI          | methyl or ethyl amine           | fully methylate or ethylate an amine |
| KNORRPYRAZOLE    | RC(=O)CC(=O)R, Hydrazin    | Pyrazole                        | Knorr Pyrazole synthesis             |
| ALKYLATENP       | aromatic N, SN2 halegonide | N-alklated aromatic heterocycle | Alkylation of aromatic nitrogen      |
| CXBORYLATION     | prim./sec. halogenide      | alkyl-B(OH) <sub>2</sub>        | Boronation of halogenide             |
| ALKYLATESECAM    | sec. amine                 | prim./sec. halogenide           | Alkylation of sec. amine             |
| ALKYLATENPORNPH  | aromatic N or NH           | prim./sec. halogenide           | Alkylation of aromatic amine         |
| PYRIDINETOC      | pyridine                   | phenyl equivalent               | Replace pyridine with phenyl         |
