# Supplementary material for: Design of organic structure directing agents to guide the synthesis of zeolites for the separation of ethylene–ethane mixtures
Source: RSC Adv. 2020 May 27;10(34):20313–21. doi: 10.1039/d0ra02896g (PMC9054118; doi:10.1039/d0ra02896g)
Supplement: RA-010-D0RA02896G-s002 [file RA-010-D0RA02896G-s002.sdf]

/home/frits/DFT_14a/Syn030205/Syn030205.car
 OpenBabel02252016433D

 17 17  0  0  0  0  0  0  0  0999 V2000
   -2.2811   -0.8789   -0.0000 N   0  0  0  0  0  0  0  0  0  0  0  0
   -2.8097   -1.7429   -0.0000 H   0  0  0  0  0  0  0  0  0  0  0  0
   -0.9303   -0.8816   -0.0000 N   0  0  0  0  0  0  0  0  0  0  0  0
   -0.5438    0.3687   -0.0000 C   0  0  0  0  0  0  0  0  0  0  0  0
   -1.6049    1.2200    0.0000 C   0  0  0  0  0  0  0  0  0  0  0  0
   -1.6234    2.3010    0.0000 H   0  0  0  0  0  0  0  0  0  0  0  0
   -2.6453    0.3622    0.0000 C   0  0  0  0  0  0  0  0  0  0  0  0
   -3.6986    0.6047    0.0000 H   0  0  0  0  0  0  0  0  0  0  0  0
    0.7841    0.7829    0.0000 N   0  0  0  0  0  0  0  0  0  0  0  0
    0.8680    1.7975   -0.0000 H   0  0  0  0  0  0  0  0  0  0  0  0
    1.9568    0.0315   -0.0000 C   0  0  0  0  0  0  0  0  0  0  0  0
    3.1660    0.6428   -0.0000 C   0  0  0  0  0  0  0  0  0  0  0  0
    3.2575    1.7236   -0.0000 H   0  0  0  0  0  0  0  0  0  0  0  0
    4.0905    0.0753   -0.0000 H   0  0  0  0  0  0  0  0  0  0  0  0
    1.8736   -1.3452    0.0000 N   0  0  0  0  0  0  0  0  0  0  0  0
    0.9843   -1.8374    0.0000 H   0  0  0  0  0  0  0  0  0  0  0  0
    2.7081   -1.9255    0.0000 H   0  0  0  0  0  0  0  0  0  0  0  0
  1  7  1  0  0  0  0
  2  1  1  0  0  0  0
  3  1  1  0  0  0  0
  3  4  2  0  0  0  0
  4  9  1  0  0  0  0
  4  5  1  0  0  0  0
  5  6  1  0  0  0  0
  7  8  1  0  0  0  0
  7  5  2  0  0  0  0
 10  9  1  0  0  0  0
 11  9  1  0  0  0  0
 11 15  2  0  0  0  0
 12 14  1  0  0  0  0
 12 11  1  0  0  0  0
 13 12  1  0  0  0  0
 15 16  1  0  0  0  0
 17 15  1  0  0  0  0
M  RAD  1  12   2
M  END
>  <MD_stabilization_energy>
-15.256

$$$$
/home/frits/DFT_14a/Syn009044/Syn009044.car
 OpenBabel02252016433D

 16 16  0  0  0  0  0  0  0  0999 V2000
   -2.3141   -0.8421   -0.0000 N   0  0  0  0  0  0  0  0  0  0  0  0
   -2.8694   -1.6889   -0.0000 H   0  0  0  0  0  0  0  0  0  0  0  0
   -0.9779   -0.8815   -0.0000 N   0  0  0  0  0  0  0  0  0  0  0  0
   -0.5853    0.3611   -0.0000 C   0  0  0  0  0  0  0  0  0  0  0  0
   -1.5968    1.1458    0.0000 N   0  0  0  0  0  0  0  0  0  0  0  0
   -2.6375    0.4092    0.0000 C   0  0  0  0  0  0  0  0  0  0  0  0
   -3.6526    0.7812    0.0000 H   0  0  0  0  0  0  0  0  0  0  0  0
    0.7581    0.8244   -0.0000 C   0  0  0  0  0  0  0  0  0  0  0  0
    0.8892    1.9025   -0.0000 H   0  0  0  0  0  0  0  0  0  0  0  0
    1.8812    0.0325    0.0000 C   0  0  0  0  0  0  0  0  0  0  0  0
    3.1323    0.6096   -0.0000 N   0  0  0  0  0  0  0  0  0  0  0  0
    3.9864    0.0578    0.0000 H   0  0  0  0  0  0  0  0  0  0  0  0
    3.2498    1.6193   -0.0000 H   0  0  0  0  0  0  0  0  0  0  0  0
    1.8730   -1.3480    0.0000 N   0  0  0  0  0  0  0  0  0  0  0  0
    1.0015   -1.8715    0.0000 H   0  0  0  0  0  0  0  0  0  0  0  0
    2.7279   -1.8983    0.0000 H   0  0  0  0  0  0  0  0  0  0  0  0
  1  6  1  0  0  0  0
  2  1  1  0  0  0  0
  3  1  1  0  0  0  0
  3  4  2  0  0  0  0
  4  5  1  0  0  0  0
  6  5  2  0  0  0  0
  6  7  1  0  0  0  0
  8  4  1  0  0  0  0
  8 10  1  0  0  0  0
  9  8  1  0  0  0  0
 10 14  1  0  0  0  0
 11 12  1  0  0  0  0
 11 10  2  0  0  0  0
 13 11  1  0  0  0  0
 14 16  1  0  0  0  0
 14 15  1  0  0  0  0
M  RAD  1   8   2
M  END
>  <MD_stabilization_energy>
-14.828

$$$$
/home/frits/DFT_14b/Syn101567/Syn101567.car
 OpenBabel02252016433D

 17 17  0  0  0  0  0  0  0  0999 V2000
   -1.6764    1.1002    0.0001 N   0  0  0  0  0  0  0  0  0  0  0  0
   -1.6945    2.1137    0.0003 H   0  0  0  0  0  0  0  0  0  0  0  0
   -0.6149    0.3252   -0.0001 C   0  0  0  0  0  0  0  0  0  0  0  0
   -0.9840   -0.9339   -0.0002 N   0  0  0  0  0  0  0  0  0  0  0  0
   -2.2685   -0.9558   -0.0001 C   0  0  0  0  0  0  0  0  0  0  0  0
   -2.8192   -1.8859   -0.0001 H   0  0  0  0  0  0  0  0  0  0  0  0
   -2.7047    0.3259    0.0001 C   0  0  0  0  0  0  0  0  0  0  0  0
   -3.7113    0.7203    0.0003 H   0  0  0  0  0  0  0  0  0  0  0  0
    0.7236    0.8124   -0.0001 C   0  0  0  0  0  0  0  0  0  0  0  0
    0.8383    1.8922   -0.0002 H   0  0  0  0  0  0  0  0  0  0  0  0
    1.8617    0.0412    0.0000 C   0  0  0  0  0  0  0  0  0  0  0  0
    1.8784   -1.3389    0.0002 N   0  0  0  0  0  0  0  0  0  0  0  0
    1.0144   -1.8752    0.0002 H   0  0  0  0  0  0  0  0  0  0  0  0
    2.7421   -1.8749    0.0003 H   0  0  0  0  0  0  0  0  0  0  0  0
    3.1023    0.6409   -0.0000 N   0  0  0  0  0  0  0  0  0  0  0  0
    3.2016    1.6526   -0.0002 H   0  0  0  0  0  0  0  0  0  0  0  0
    3.9660    0.1044    0.0000 H   0  0  0  0  0  0  0  0  0  0  0  0
  1  2  1  0  0  0  0
  3  1  1  0  0  0  0
  4  5  1  0  0  0  0
  4  3  2  0  0  0  0
  5  7  2  0  0  0  0
  6  5  1  0  0  0  0
  7  1  1  0  0  0  0
  7  8  1  0  0  0  0
  9  3  1  0  0  0  0
  9 11  1  0  0  0  0
 10  9  1  0  0  0  0
 11 12  1  0  0  0  0
 12 13  1  0  0  0  0
 12 14  1  0  0  0  0
 15 11  2  0  0  0  0
 15 17  1  0  0  0  0
 16 15  1  0  0  0  0
M  RAD  1   9   2
M  END
>  <MD_stabilization_energy>
-14.361

$$$$
/home/frits/DFT_14b/Syn012928/Syn012928.car
 OpenBabel02252016433D

 15 15  0  0  0  0  0  0  0  0999 V2000
   -1.6034    1.0989   -0.1956 N   0  0  0  0  0  0  0  0  0  0  0  0
   -1.6939    2.0862   -0.4020 H   0  0  0  0  0  0  0  0  0  0  0  0
   -2.6312    0.2990   -0.1721 N   0  0  0  0  0  0  0  0  0  0  0  0
   -2.2422   -0.9023    0.1135 N   0  0  0  0  0  0  0  0  0  0  0  0
   -0.9467   -0.9307    0.2863 N   0  0  0  0  0  0  0  0  0  0  0  0
   -0.6015    0.3137    0.0883 C   0  0  0  0  0  0  0  0  0  0  0  0
    0.7334    0.7953    0.1662 C   0  0  0  0  0  0  0  0  0  0  0  0
    0.8485    1.8620    0.3340 H   0  0  0  0  0  0  0  0  0  0  0  0
    1.8663    0.0379   -0.0078 C   0  0  0  0  0  0  0  0  0  0  0  0
    1.8751   -1.3186   -0.2646 N   0  0  0  0  0  0  0  0  0  0  0  0
    2.7367   -1.8427   -0.3933 H   0  0  0  0  0  0  0  0  0  0  0  0
    1.0121   -1.8518   -0.3297 H   0  0  0  0  0  0  0  0  0  0  0  0
    3.1090    0.6280    0.0645 N   0  0  0  0  0  0  0  0  0  0  0  0
    3.9697    0.1012   -0.0604 H   0  0  0  0  0  0  0  0  0  0  0  0
    3.2137    1.6223    0.2480 H   0  0  0  0  0  0  0  0  0  0  0  0
  1  3  1  0  0  0  0
  1  6  1  0  0  0  0
  2  1  1  0  0  0  0
  3  4  2  0  0  0  0
  4  5  1  0  0  0  0
  6  7  1  0  0  0  0
  6  5  2  0  0  0  0
  7  8  1  0  0  0  0
  9 13  1  0  0  0  0
  9  7  1  0  0  0  0
 10  9  2  0  0  0  0
 11 10  1  0  0  0  0
 12 10  1  0  0  0  0
 13 15  1  0  0  0  0
 14 13  1  0  0  0  0
M  RAD  1   7   2
M  END
>  <MD_stabilization_energy>
-14.187

$$$$
/home/frits/DFT_14c/Syn102867/Syn102867.car
 OpenBabel02252016433D

 15 15  0  0  0  0  0  0  0  0999 V2000
    2.5533    0.9939    0.0000 N   0  0  0  0  0  0  0  0  0  0  0  0
    3.4491    0.5162    0.0000 H   0  0  0  0  0  0  0  0  0  0  0  0
    2.5534    2.0105   -0.0000 H   0  0  0  0  0  0  0  0  0  0  0  0
    1.3824    0.2670    0.0000 C   0  0  0  0  0  0  0  0  0  0  0  0
    1.3878   -1.0248    0.0000 N   0  0  0  0  0  0  0  0  0  0  0  0
    2.1257   -1.7200    0.0000 H   0  0  0  0  0  0  0  0  0  0  0  0
    0.0831   -1.3900    0.0000 N   0  0  0  0  0  0  0  0  0  0  0  0
   -0.6304   -0.2913   -0.0000 C   0  0  0  0  0  0  0  0  0  0  0  0
    0.1544    0.8279   -0.0000 C   0  0  0  0  0  0  0  0  0  0  0  0
   -0.1238    1.8734   -0.0000 H   0  0  0  0  0  0  0  0  0  0  0  0
   -2.0121   -0.3486   -0.0000 N   0  0  0  0  0  0  0  0  0  0  0  0
   -2.4598   -1.2606   -0.0000 H   0  0  0  0  0  0  0  0  0  0  0  0
   -2.7099    0.8562    0.0000 N   0  0  0  0  0  0  0  0  0  0  0  0
   -3.3243    0.8483    0.8141 H   0  0  0  0  0  0  0  0  0  0  0  0
   -3.3243    0.8483   -0.8141 H   0  0  0  0  0  0  0  0  0  0  0  0
  1  2  1  0  0  0  0
  3  1  1  0  0  0  0
  4  1  1  0  0  0  0
  4  5  1  0  0  0  0
  5  6  1  0  0  0  0
  7  5  1  0  0  0  0
  8  7  2  0  0  0  0
  9  8  1  0  0  0  0
  9  4  2  0  0  0  0
 10  9  1  0  0  0  0
 11  8  1  0  0  0  0
 11 13  1  0  0  0  0
 12 11  1  0  0  0  0
 13 14  1  0  0  0  0
 15 13  1  0  0  0  0
M  END
>  <MD_stabilization_energy>
-13.909

$$$$
/home/frits/DFT_14a/Syn011964/Syn011964.car
 OpenBabel02252016433D

 17 17  0  0  0  0  0  0  0  0999 V2000
   -2.2985   -0.8398   -0.2135 N   0  0  0  0  0  0  0  0  0  0  0  0
   -2.8298   -1.6796   -0.4113 H   0  0  0  0  0  0  0  0  0  0  0  0
   -0.9734   -0.7678   -0.4737 N   0  0  0  0  0  0  0  0  0  0  0  0
   -0.5839    0.4280   -0.1128 C   0  0  0  0  0  0  0  0  0  0  0  0
   -1.6063    1.1700    0.3823 C   0  0  0  0  0  0  0  0  0  0  0  0
   -1.6020    2.1841    0.7562 H   0  0  0  0  0  0  0  0  0  0  0  0
   -2.6379    0.3061    0.2846 C   0  0  0  0  0  0  0  0  0  0  0  0
   -3.6671    0.4751    0.5690 H   0  0  0  0  0  0  0  0  0  0  0  0
    0.7732    0.8114   -0.2723 C   0  0  0  0  0  0  0  0  0  0  0  0
    0.9494    1.8380   -0.5796 H   0  0  0  0  0  0  0  0  0  0  0  0
    1.8540    0.0162    0.0178 C   0  0  0  0  0  0  0  0  0  0  0  0
    1.7689   -1.2855    0.4698 N   0  0  0  0  0  0  0  0  0  0  0  0
    0.8702   -1.7442    0.5940 H   0  0  0  0  0  0  0  0  0  0  0  0
    2.5917   -1.8424    0.6848 H   0  0  0  0  0  0  0  0  0  0  0  0
    3.1331    0.5053   -0.1286 N   0  0  0  0  0  0  0  0  0  0  0  0
    3.9564   -0.0540    0.0787 H   0  0  0  0  0  0  0  0  0  0  0  0
    3.3032    1.4532   -0.4541 H   0  0  0  0  0  0  0  0  0  0  0  0
  1  7  1  0  0  0  0
  2  1  1  0  0  0  0
  3  1  1  0  0  0  0
  3  4  2  0  0  0  0
  4  5  1  0  0  0  0
  5  6  1  0  0  0  0
  7  5  2  0  0  0  0
  7  8  1  0  0  0  0
  9  4  1  0  0  0  0
  9 11  1  0  0  0  0
 10  9  1  0  0  0  0
 11 12  1  0  0  0  0
 12 13  1  0  0  0  0
 12 14  1  0  0  0  0
 15 11  2  0  0  0  0
 15 16  1  0  0  0  0
 17 15  1  0  0  0  0
M  RAD  1   9   2
M  END
>  <MD_stabilization_energy>
-13.481

$$$$
/home/frits/DFT_14a/Syn068483/Syn068483.car
 OpenBabel02252016433D

 15 15  0  0  0  0  0  0  0  0999 V2000
    5.8136    4.1658    4.0998 N   0  0  0  0  0  0  0  0  0  0  0  0
    6.1262    3.4734    3.4264 H   0  0  0  0  0  0  0  0  0  0  0  0
    5.9839    3.9709    5.0814 H   0  0  0  0  0  0  0  0  0  0  0  0
    5.1824    5.3258    3.6973 C   0  0  0  0  0  0  0  0  0  0  0  0
    4.8735    5.7516    2.4501 C   0  0  0  0  0  0  0  0  0  0  0  0
    4.2714    6.9079    2.4348 N   0  0  0  0  0  0  0  0  0  0  0  0
    3.9157    7.4910    1.6859 H   0  0  0  0  0  0  0  0  0  0  0  0
    4.1579    7.3030    3.7425 N   0  0  0  0  0  0  0  0  0  0  0  0
    4.7026    6.3497    4.4424 C   0  0  0  0  0  0  0  0  0  0  0  0
    4.7549    6.4346    5.8155 N   0  0  0  0  0  0  0  0  0  0  0  0
    4.3652    7.2474    6.2816 H   0  0  0  0  0  0  0  0  0  0  0  0
    5.1727    5.7084    6.3895 H   0  0  0  0  0  0  0  0  0  0  0  0
    5.1468    5.0681    1.2833 N   0  0  0  0  0  0  0  0  0  0  0  0
    5.6151    4.1667    1.2799 H   0  0  0  0  0  0  0  0  0  0  0  0
    4.8775    5.4654    0.3892 H   0  0  0  0  0  0  0  0  0  0  0  0
  1  3  1  0  0  0  0
  2  1  1  0  0  0  0
  4  1  1  0  0  0  0
  4  9  1  0  0  0  0
  5  4  2  0  0  0  0
  6  5  1  0  0  0  0
  6  8  1  0  0  0  0
  7  6  1  0  0  0  0
  8  9  2  0  0  0  0
  9 10  1  0  0  0  0
 10 11  1  0  0  0  0
 10 12  1  0  0  0  0
 13  5  1  0  0  0  0
 14 13  1  0  0  0  0
 15 13  1  0  0  0  0
M  END
>  <MD_stabilization_energy>
-13.284

$$$$
/home/frits/DFT_14b/Syn019651/Syn019651.car
 OpenBabel02252016433D

 15 15  0  0  0  0  0  0  0  0999 V2000
   -2.7762   -0.4807    0.0000 N   0  0  0  0  0  0  0  0  0  0  0  0
   -3.5198    0.2100    0.0000 H   0  0  0  0  0  0  0  0  0  0  0  0
   -3.0153   -1.4671   -0.0000 H   0  0  0  0  0  0  0  0  0  0  0  0
   -1.4640   -0.0848   -0.0000 C   0  0  0  0  0  0  0  0  0  0  0  0
   -1.0935    1.1487   -0.0000 N   0  0  0  0  0  0  0  0  0  0  0  0
    0.2442    1.0887   -0.0000 N   0  0  0  0  0  0  0  0  0  0  0  0
    0.7925    1.9408   -0.0000 H   0  0  0  0  0  0  0  0  0  0  0  0
    0.5835   -0.1774   -0.0000 C   0  0  0  0  0  0  0  0  0  0  0  0
   -0.4800   -0.8926   -0.0000 N   0  0  0  0  0  0  0  0  0  0  0  0
    1.8617   -0.7010   -0.0000 N   0  0  0  0  0  0  0  0  0  0  0  0
    1.8933   -1.7164   -0.0000 H   0  0  0  0  0  0  0  0  0  0  0  0
    2.9909    0.0868    0.0000 C   0  0  0  0  0  0  0  0  0  0  0  0
    3.8690   -0.5653   -0.0000 H   0  0  0  0  0  0  0  0  0  0  0  0
    3.0068    0.7103   -0.8998 H   0  0  0  0  0  0  0  0  0  0  0  0
    3.0068    0.7103    0.8998 H   0  0  0  0  0  0  0  0  0  0  0  0
  1  2  1  0  0  0  0
  3  1  1  0  0  0  0
  4  1  1  0  0  0  0
  5  4  2  0  0  0  0
  6  5  1  0  0  0  0
  7  6  1  0  0  0  0
  8  6  1  0  0  0  0
  8  9  2  0  0  0  0
  9  4  1  0  0  0  0
 10  8  1  0  0  0  0
 10 11  1  0  0  0  0
 10 12  1  0  0  0  0
 12 15  1  0  0  0  0
 13 12  1  0  0  0  0
 14 12  1  0  0  0  0
M  END
>  <MD_stabilization_energy>
-13.212

$$$$
/home/frits/DFT_14c/Syn007134/Syn007134.car
 OpenBabel02252016433D

 14 14  0  0  0  0  0  0  0  0999 V2000
   -0.2442    1.0698   -0.0000 N   0  0  0  0  0  0  0  0  0  0  0  0
   -0.8195    1.9035   -0.0000 H   0  0  0  0  0  0  0  0  0  0  0  0
    1.0920    1.1523   -0.0000 N   0  0  0  0  0  0  0  0  0  0  0  0
    1.4803   -0.0761    0.0000 C   0  0  0  0  0  0  0  0  0  0  0  0
    0.5087   -0.8994   -0.0000 N   0  0  0  0  0  0  0  0  0  0  0  0
   -0.5645   -0.1998   -0.0000 C   0  0  0  0  0  0  0  0  0  0  0  0
   -1.8352   -0.7350   -0.0000 N   0  0  0  0  0  0  0  0  0  0  0  0
   -1.9537   -1.7442    0.0000 H   0  0  0  0  0  0  0  0  0  0  0  0
   -2.8811    0.1792    0.0000 N   0  0  0  0  0  0  0  0  0  0  0  0
   -3.4599   -0.0260    0.8142 H   0  0  0  0  0  0  0  0  0  0  0  0
   -3.4600   -0.0261   -0.8142 H   0  0  0  0  0  0  0  0  0  0  0  0
    2.7983   -0.4525    0.0000 N   0  0  0  0  0  0  0  0  0  0  0  0
    3.0521   -1.4351    0.0000 H   0  0  0  0  0  0  0  0  0  0  0  0
    3.5314    0.2493    0.0000 H   0  0  0  0  0  0  0  0  0  0  0  0
  1  3  1  0  0  0  0
  2  1  1  0  0  0  0
  3  4  2  0  0  0  0
  4 12  1  0  0  0  0
  5  4  1  0  0  0  0
  6  1  1  0  0  0  0
  6  5  2  0  0  0  0
  7  6  1  0  0  0  0
  7  8  1  0  0  0  0
  7  9  1  0  0  0  0
  9 10  1  0  0  0  0
 11  9  1  0  0  0  0
 12 13  1  0  0  0  0
 14 12  1  0  0  0  0
M  END
>  <MD_stabilization_energy>
-13.121

$$$$
/home/frits/DFT_14b/Syn044608/Syn044608.car
 OpenBabel02252016433D

 19 19  0  0  0  0  0  0  0  0999 V2000
   -2.4188   -0.8746    0.2952 N   0  0  0  0  0  0  0  0  0  0  0  0
   -3.0938   -1.5980    0.5126 H   0  0  0  0  0  0  0  0  0  0  0  0
   -2.7300    0.4360    0.4162 N   0  0  0  0  0  0  0  0  0  0  0  0
   -1.6601    1.0856    0.0654 C   0  0  0  0  0  0  0  0  0  0  0  0
   -1.6841    2.1667    0.0873 H   0  0  0  0  0  0  0  0  0  0  0  0
   -0.6223    0.2899   -0.2927 C   0  0  0  0  0  0  0  0  0  0  0  0
   -1.1898   -0.9299   -0.1181 C   0  0  0  0  0  0  0  0  0  0  0  0
   -0.7423   -1.9011   -0.2802 H   0  0  0  0  0  0  0  0  0  0  0  0
    0.6445    0.6551   -0.7137 N   0  0  0  0  0  0  0  0  0  0  0  0
    0.8317    1.6542   -0.6944 H   0  0  0  0  0  0  0  0  0  0  0  0
    1.7055   -0.3070   -0.9828 C   0  0  0  0  0  0  0  0  0  0  0  0
    2.4703   -0.7159    0.2869 C   0  0  0  0  0  0  0  0  0  0  0  0
    3.2463   -1.4432    0.0281 H   0  0  0  0  0  0  0  0  0  0  0  0
    1.7934   -1.1993    0.9982 H   0  0  0  0  0  0  0  0  0  0  0  0
    3.0818    0.4455    0.9291 N   0  0  0  0  0  0  0  0  0  0  0  0
    3.6008    0.1480    1.7547 H   0  0  0  0  0  0  0  0  0  0  0  0
    3.7641    0.8763    0.3051 H   0  0  0  0  0  0  0  0  0  0  0  0
    2.3845    0.1631   -1.7020 H   0  0  0  0  0  0  0  0  0  0  0  0
    1.2816   -1.1860   -1.4791 H   0  0  0  0  0  0  0  0  0  0  0  0
  1  3  1  0  0  0  0
  1  2  1  0  0  0  0
  4  5  1  0  0  0  0
  4  3  2  0  0  0  0
  6  7  2  0  0  0  0
  6  4  1  0  0  0  0
  7  1  1  0  0  0  0
  8  7  1  0  0  0  0
  9 10  1  0  0  0  0
  9  6  1  0  0  0  0
 11  9  1  0  0  0  0
 11 12  1  0  0  0  0
 12 15  1  0  0  0  0
 12 14  1  0  0  0  0
 13 12  1  0  0  0  0
 15 16  1  0  0  0  0
 17 15  1  0  0  0  0
 18 11  1  0  0  0  0
 19 11  1  0  0  0  0
M  END
>  <MD_stabilization_energy>
-12.831

$$$$
/home/frits/DFT_14c/Syn018338/Syn018338.car
 OpenBabel02252016433D

 13 13  0  0  0  0  0  0  0  0999 V2000
   -1.9406   -0.3821    0.0000 N   0  0  0  0  0  0  0  0  0  0  0  0
   -2.8341   -0.8594    0.0000 H   0  0  0  0  0  0  0  0  0  0  0  0
   -0.7763   -1.0696    0.0000 N   0  0  0  0  0  0  0  0  0  0  0  0
    0.1871   -0.1892   -0.0000 C   0  0  0  0  0  0  0  0  0  0  0  0
   -0.2945    1.0866   -0.0000 C   0  0  0  0  0  0  0  0  0  0  0  0
    0.2334    2.0300   -0.0000 H   0  0  0  0  0  0  0  0  0  0  0  0
   -1.6261    0.8730    0.0000 C   0  0  0  0  0  0  0  0  0  0  0  0
   -2.4117    1.6154    0.0000 H   0  0  0  0  0  0  0  0  0  0  0  0
    1.5100   -0.5896   -0.0000 N   0  0  0  0  0  0  0  0  0  0  0  0
    1.7146   -1.5846   -0.0000 H   0  0  0  0  0  0  0  0  0  0  0  0
    2.4875    0.4021    0.0000 N   0  0  0  0  0  0  0  0  0  0  0  0
    3.0801    0.2405    0.8142 H   0  0  0  0  0  0  0  0  0  0  0  0
    3.0802    0.2405   -0.8141 H   0  0  0  0  0  0  0  0  0  0  0  0
  1  2  1  0  0  0  0
  3  1  1  0  0  0  0
  4  3  2  0  0  0  0
  5  4  1  0  0  0  0
  5  7  2  0  0  0  0
  6  5  1  0  0  0  0
  7  8  1  0  0  0  0
  7  1  1  0  0  0  0
  9  4  1  0  0  0  0
  9 10  1  0  0  0  0
  9 11  1  0  0  0  0
 11 12  1  0  0  0  0
 13 11  1  0  0  0  0
M  END
>  <MD_stabilization_energy>
-12.673

$$$$
/home/frits/DFT_14c/Syn091442/Syn091442.car
 OpenBabel02252016433D

 15 15  0  0  0  0  0  0  0  0999 V2000
   -1.0845    1.9331   -0.0000 N   0  0  0  0  0  0  0  0  0  0  0  0
   -0.3311    2.6136   -0.0000 H   0  0  0  0  0  0  0  0  0  0  0  0
   -2.0387    2.2785   -0.0000 H   0  0  0  0  0  0  0  0  0  0  0  0
   -0.8576    0.5753    0.0000 C   0  0  0  0  0  0  0  0  0  0  0  0
   -1.8649   -0.2393   -0.0000 N   0  0  0  0  0  0  0  0  0  0  0  0
   -1.3099   -1.4735   -0.0000 N   0  0  0  0  0  0  0  0  0  0  0  0
   -1.8853   -2.3069   -0.0000 H   0  0  0  0  0  0  0  0  0  0  0  0
   -0.0178   -1.3095    0.0000 C   0  0  0  0  0  0  0  0  0  0  0  0
    0.6122   -2.1886    0.0000 H   0  0  0  0  0  0  0  0  0  0  0  0
    0.3727   -0.0053    0.0000 C   0  0  0  0  0  0  0  0  0  0  0  0
    1.6324    0.5741    0.0000 N   0  0  0  0  0  0  0  0  0  0  0  0
    1.7300    1.5854    0.0000 H   0  0  0  0  0  0  0  0  0  0  0  0
    2.7219   -0.2938   -0.0000 N   0  0  0  0  0  0  0  0  0  0  0  0
    3.2920   -0.0634    0.8140 H   0  0  0  0  0  0  0  0  0  0  0  0
    3.2920   -0.0634   -0.8140 H   0  0  0  0  0  0  0  0  0  0  0  0
  1  3  1  0  0  0  0
  1  4  1  0  0  0  0
  2  1  1  0  0  0  0
  4 10  1  0  0  0  0
  5  6  1  0  0  0  0
  5  4  2  0  0  0  0
  6  8  1  0  0  0  0
  7  6  1  0  0  0  0
  8 10  2  0  0  0  0
  8  9  1  0  0  0  0
 10 11  1  0  0  0  0
 11 12  1  0  0  0  0
 13 11  1  0  0  0  0
 13 14  1  0  0  0  0
 15 13  1  0  0  0  0
M  END
>  <MD_stabilization_energy>
-12.644

$$$$
/home/frits/DFT_14c/Syn128270/Syn128270.car
 OpenBabel02252016433D

 14 13  0  0  0  0  0  0  0  0999 V2000
    1.4437    1.1585   -0.0000 N   0  0  0  0  0  0  0  0  0  0  0  0
    2.4599    1.1403    0.0000 H   0  0  0  0  0  0  0  0  0  0  0  0
    1.0294    2.0842   -0.0000 H   0  0  0  0  0  0  0  0  0  0  0  0
    0.6921   -0.0000   -0.0000 C   0  0  0  0  0  0  0  0  0  0  0  0
   -0.6921    0.0000   -0.0000 C   0  0  0  0  0  0  0  0  0  0  0  0
   -1.4437    1.1585    0.0000 N   0  0  0  0  0  0  0  0  0  0  0  0
   -1.0294    2.0842    0.0000 H   0  0  0  0  0  0  0  0  0  0  0  0
   -2.4599    1.1403    0.0000 H   0  0  0  0  0  0  0  0  0  0  0  0
   -1.4437   -1.1585   -0.0000 N   0  0  0  0  0  0  0  0  0  0  0  0
   -2.4599   -1.1403   -0.0000 H   0  0  0  0  0  0  0  0  0  0  0  0
   -1.0294   -2.0842   -0.0000 H   0  0  0  0  0  0  0  0  0  0  0  0
    1.4437   -1.1585    0.0000 N   0  0  0  0  0  0  0  0  0  0  0  0
    1.0294   -2.0842    0.0000 H   0  0  0  0  0  0  0  0  0  0  0  0
    2.4599   -1.1403   -0.0000 H   0  0  0  0  0  0  0  0  0  0  0  0
  1  4  2  0  0  0  0
  1  2  1  0  0  0  0
  3  1  1  0  0  0  0
  4  5  1  0  0  0  0
  4 12  1  0  0  0  0
  5  6  1  0  0  0  0
  6  8  1  0  0  0  0
  6  7  1  0  0  0  0
  9 10  1  0  0  0  0
  9  5  2  0  0  0  0
 11  9  1  0  0  0  0
 12 13  1  0  0  0  0
 14 12  1  0  0  0  0
M  END
>  <MD_stabilization_energy>
-12.595

$$$$
/home/frits/DFT_14c/Syn060025/Syn060025.car
 OpenBabel02252016433D

 17 17  0  0  0  0  0  0  0  0999 V2000
   -1.3134    0.9980    0.2164 N   0  0  0  0  0  0  0  0  0  0  0  0
   -1.4311    1.9834    0.4261 H   0  0  0  0  0  0  0  0  0  0  0  0
   -2.3804    0.1666    0.2526 N   0  0  0  0  0  0  0  0  0  0  0  0
   -1.9213   -1.0047   -0.0557 C   0  0  0  0  0  0  0  0  0  0  0  0
   -2.6034   -1.8422   -0.0911 H   0  0  0  0  0  0  0  0  0  0  0  0
   -0.5951   -1.0191   -0.3014 C   0  0  0  0  0  0  0  0  0  0  0  0
    0.0254   -1.8606   -0.5756 H   0  0  0  0  0  0  0  0  0  0  0  0
   -0.2665    0.2877   -0.1108 C   0  0  0  0  0  0  0  0  0  0  0  0
    0.9936    0.8499   -0.2345 N   0  0  0  0  0  0  0  0  0  0  0  0
    1.0205    1.8417   -0.0167 H   0  0  0  0  0  0  0  0  0  0  0  0
    2.2037    0.0984   -0.5429 C   0  0  0  0  0  0  0  0  0  0  0  0
    2.8179   -0.5544    0.6961 C   0  0  0  0  0  0  0  0  0  0  0  0
    3.0459    0.1951    1.4601 H   0  0  0  0  0  0  0  0  0  0  0  0
    2.1362   -1.2854    1.1406 H   0  0  0  0  0  0  0  0  0  0  0  0
    3.7461   -1.0696    0.4339 H   0  0  0  0  0  0  0  0  0  0  0  0
    2.9170    0.8096   -0.9697 H   0  0  0  0  0  0  0  0  0  0  0  0
    1.9893   -0.6455   -1.3165 H   0  0  0  0  0  0  0  0  0  0  0  0
  1  3  1  0  0  0  0
  1  2  1  0  0  0  0
  4  3  2  0  0  0  0
  5  4  1  0  0  0  0
  6  8  2  0  0  0  0
  6  4  1  0  0  0  0
  7  6  1  0  0  0  0
  8  1  1  0  0  0  0
  9  8  1  0  0  0  0
  9 10  1  0  0  0  0
 11  9  1  0  0  0  0
 11 12  1  0  0  0  0
 12 14  1  0  0  0  0
 12 13  1  0  0  0  0
 15 12  1  0  0  0  0
 16 11  1  0  0  0  0
 17 11  1  0  0  0  0
M  END
>  <MD_stabilization_energy>
-12.522

$$$$
/home/frits/DFT_14b/Syn001700/Syn001700.car
 OpenBabel02252016433D

 16 16  0  0  0  0  0  0  0  0999 V2000
   -2.3185   -0.1344   -0.2462 N   0  0  0  0  0  0  0  0  0  0  0  0
   -3.2599   -0.4182   -0.4875 H   0  0  0  0  0  0  0  0  0  0  0  0
   -1.3020   -1.0011   -0.2582 N   0  0  0  0  0  0  0  0  0  0  0  0
   -0.2433   -0.3315    0.0943 C   0  0  0  0  0  0  0  0  0  0  0  0
   -0.5654    0.8897    0.3184 N   0  0  0  0  0  0  0  0  0  0  0  0
   -1.8172    0.9994    0.1106 C   0  0  0  0  0  0  0  0  0  0  0  0
   -2.3805    1.9156    0.2185 H   0  0  0  0  0  0  0  0  0  0  0  0
    1.0147   -0.8835    0.1996 N   0  0  0  0  0  0  0  0  0  0  0  0
    1.0541   -1.8646   -0.0594 H   0  0  0  0  0  0  0  0  0  0  0  0
    2.1957   -0.1043    0.5393 C   0  0  0  0  0  0  0  0  0  0  0  0
    2.7964    0.6028   -0.6760 C   0  0  0  0  0  0  0  0  0  0  0  0
    2.0905    1.3199   -1.1056 H   0  0  0  0  0  0  0  0  0  0  0  0
    3.0576   -0.1169   -1.4578 H   0  0  0  0  0  0  0  0  0  0  0  0
    3.7026    1.1447   -0.3916 H   0  0  0  0  0  0  0  0  0  0  0  0
    2.9278   -0.8012    0.9576 H   0  0  0  0  0  0  0  0  0  0  0  0
    1.9430    0.6152    1.3250 H   0  0  0  0  0  0  0  0  0  0  0  0
  1  6  1  0  0  0  0
  2  1  1  0  0  0  0
  3  1  1  0  0  0  0
  3  4  2  0  0  0  0
  4  8  1  0  0  0  0
  4  5  1  0  0  0  0
  6  7  1  0  0  0  0
  6  5  2  0  0  0  0
  8 10  1  0  0  0  0
  9  8  1  0  0  0  0
 10 15  1  0  0  0  0
 10 16  1  0  0  0  0
 11 14  1  0  0  0  0
 11 10  1  0  0  0  0
 12 11  1  0  0  0  0
 13 11  1  0  0  0  0
M  END
>  <MD_stabilization_energy>
-12.432

$$$$
/home/frits/DFT_14b/Syn156094/Syn156094.car
 OpenBabel02252016433D

 16 17  0  0  0  0  0  0  0  0999 V2000
    2.7395    0.6327   -0.0000 N   0  0  0  0  0  0  0  0  0  0  0  0
    3.5014    1.3007    0.0000 H   0  0  0  0  0  0  0  0  0  0  0  0
    1.4477    1.0379    0.0000 N   0  0  0  0  0  0  0  0  0  0  0  0
    0.7166   -0.0469    0.0000 C   0  0  0  0  0  0  0  0  0  0  0  0
    1.4718   -1.1776   -0.0000 C   0  0  0  0  0  0  0  0  0  0  0  0
    1.1660   -2.2146   -0.0000 H   0  0  0  0  0  0  0  0  0  0  0  0
    2.7195   -0.6629   -0.0000 C   0  0  0  0  0  0  0  0  0  0  0  0
    3.6545   -1.2056   -0.0000 H   0  0  0  0  0  0  0  0  0  0  0  0
   -0.7166    0.0469    0.0000 C   0  0  0  0  0  0  0  0  0  0  0  0
   -1.4477   -1.0379    0.0000 N   0  0  0  0  0  0  0  0  0  0  0  0
   -2.7395   -0.6327   -0.0000 N   0  0  0  0  0  0  0  0  0  0  0  0
   -3.5014   -1.3007    0.0000 H   0  0  0  0  0  0  0  0  0  0  0  0
   -2.7195    0.6629   -0.0000 C   0  0  0  0  0  0  0  0  0  0  0  0
   -3.6545    1.2056   -0.0000 H   0  0  0  0  0  0  0  0  0  0  0  0
   -1.4718    1.1776   -0.0000 C   0  0  0  0  0  0  0  0  0  0  0  0
   -1.1660    2.2146    0.0000 H   0  0  0  0  0  0  0  0  0  0  0  0
  1  3  1  0  0  0  0
  1  2  1  0  0  0  0
  4  9  1  0  0  0  0
  4  3  2  0  0  0  0
  5  4  1  0  0  0  0
  6  5  1  0  0  0  0
  7  8  1  0  0  0  0
  7  5  2  0  0  0  0
  7  1  1  0  0  0  0
  9 10  2  0  0  0  0
 11 12  1  0  0  0  0
 11 10  1  0  0  0  0
 13 11  1  0  0  0  0
 13 15  2  0  0  0  0
 14 13  1  0  0  0  0
 15 16  1  0  0  0  0
 15  9  1  0  0  0  0
M  END
>  <MD_stabilization_energy>
-12.424

$$$$
/home/frits/DFT_14c/Syn123222/Syn123222.car
 OpenBabel02252016433D

 15 15  0  0  0  0  0  0  0  0999 V2000
   -0.5765   -0.9224   -0.2951 N   0  0  0  0  0  0  0  0  0  0  0  0
   -0.0484   -1.7433   -0.5649 H   0  0  0  0  0  0  0  0  0  0  0  0
   -1.8561   -0.9824   -0.0660 N   0  0  0  0  0  0  0  0  0  0  0  0
   -2.2922    0.1880    0.2600 N   0  0  0  0  0  0  0  0  0  0  0  0
   -1.3120    1.0512    0.2548 N   0  0  0  0  0  0  0  0  0  0  0  0
   -0.2760    0.3353   -0.0894 C   0  0  0  0  0  0  0  0  0  0  0  0
    0.9809    0.8936   -0.2095 N   0  0  0  0  0  0  0  0  0  0  0  0
    1.0093    1.8808    0.0277 H   0  0  0  0  0  0  0  0  0  0  0  0
    2.1755    0.1302   -0.5387 C   0  0  0  0  0  0  0  0  0  0  0  0
    2.7725   -0.5744    0.6800 C   0  0  0  0  0  0  0  0  0  0  0  0
    3.6890   -1.1027    0.4030 H   0  0  0  0  0  0  0  0  0  0  0  0
    3.0163    0.1455    1.4672 H   0  0  0  0  0  0  0  0  0  0  0  0
    2.0726   -1.3027    1.1002 H   0  0  0  0  0  0  0  0  0  0  0  0
    2.9036    0.8388   -0.9442 H   0  0  0  0  0  0  0  0  0  0  0  0
    1.9426   -0.5864   -1.3327 H   0  0  0  0  0  0  0  0  0  0  0  0
  1  6  1  0  0  0  0
  1  3  1  0  0  0  0
  2  1  1  0  0  0  0
  3  4  2  0  0  0  0
  5  4  1  0  0  0  0
  6  5  2  0  0  0  0
  7  6  1  0  0  0  0
  7  8  1  0  0  0  0
  9  7  1  0  0  0  0
  9 10  1  0  0  0  0
 10 13  1  0  0  0  0
 10 12  1  0  0  0  0
 11 10  1  0  0  0  0
 14  9  1  0  0  0  0
 15  9  1  0  0  0  0
M  END
>  <MD_stabilization_energy>
-12.417

$$$$
/home/frits/DFT_14c/Syn011841/Syn011841.car
 OpenBabel02252016433D

 18 18  0  0  0  0  0  0  0  0999 V2000
   -1.0854   -0.7316    0.6578 N   0  0  0  0  0  0  0  0  0  0  0  0
   -0.6013   -1.4218    1.2223 H   0  0  0  0  0  0  0  0  0  0  0  0
   -0.6009    0.3775    0.1719 C   0  0  0  0  0  0  0  0  0  0  0  0
   -1.5689    1.0731   -0.5240 C   0  0  0  0  0  0  0  0  0  0  0  0
   -1.4611    2.0227   -1.0296 H   0  0  0  0  0  0  0  0  0  0  0  0
   -2.7032    0.3084   -0.4390 C   0  0  0  0  0  0  0  0  0  0  0  0
   -3.6761    0.5194   -0.8596 H   0  0  0  0  0  0  0  0  0  0  0  0
   -2.3288   -0.7821    0.3023 C   0  0  0  0  0  0  0  0  0  0  0  0
   -2.9391   -1.6239    0.6003 H   0  0  0  0  0  0  0  0  0  0  0  0
    0.7496    0.7450    0.4043 C   0  0  0  0  0  0  0  0  0  0  0  0
    0.9150    1.6984    0.8973 H   0  0  0  0  0  0  0  0  0  0  0  0
    1.8286    0.0195   -0.0319 C   0  0  0  0  0  0  0  0  0  0  0  0
    1.7365   -1.1759   -0.7169 N   0  0  0  0  0  0  0  0  0  0  0  0
    0.8375   -1.5977   -0.9337 H   0  0  0  0  0  0  0  0  0  0  0  0
    2.5577   -1.6861   -1.0310 H   0  0  0  0  0  0  0  0  0  0  0  0
    3.1089    0.4710    0.1987 N   0  0  0  0  0  0  0  0  0  0  0  0
    3.9305   -0.0408   -0.1125 H   0  0  0  0  0  0  0  0  0  0  0  0
    3.2812    1.3416    0.6943 H   0  0  0  0  0  0  0  0  0  0  0  0
  1  2  1  0  0  0  0
  3 10  1  0  0  0  0
  3  1  1  0  0  0  0
  4  6  1  0  0  0  0
  4  3  2  0  0  0  0
  5  4  1  0  0  0  0
  6  8  2  0  0  0  0
  7  6  1  0  0  0  0
  8  9  1  0  0  0  0
  8  1  1  0  0  0  0
 10 11  1  0  0  0  0
 12 16  1  0  0  0  0
 12 10  1  0  0  0  0
 13 12  2  0  0  0  0
 14 13  1  0  0  0  0
 15 13  1  0  0  0  0
 16 18  1  0  0  0  0
 17 16  1  0  0  0  0
M  RAD  1  10   2
M  END
>  <MD_stabilization_energy>
-12.348

$$$$
/home/frits/DFT_14c/Syn171796/Syn171796.car
 OpenBabel02252016433D

 14 14  0  0  0  0  0  0  0  0999 V2000
   -0.7777    1.0566    0.0000 N   0  0  0  0  0  0  0  0  0  0  0  0
   -0.7731    2.0709    0.0000 H   0  0  0  0  0  0  0  0  0  0  0  0
   -1.9526    0.3851    0.0000 N   0  0  0  0  0  0  0  0  0  0  0  0
   -1.6374   -0.8714   -0.0000 C   0  0  0  0  0  0  0  0  0  0  0  0
   -2.4267   -1.6096    0.0000 H   0  0  0  0  0  0  0  0  0  0  0  0
   -0.3073   -1.0960   -0.0000 C   0  0  0  0  0  0  0  0  0  0  0  0
    0.2130   -2.0437   -0.0000 H   0  0  0  0  0  0  0  0  0  0  0  0
    0.1851    0.1731   -0.0000 C   0  0  0  0  0  0  0  0  0  0  0  0
    1.5213    0.5393   -0.0000 N   0  0  0  0  0  0  0  0  0  0  0  0
    1.6737    1.5434   -0.0000 H   0  0  0  0  0  0  0  0  0  0  0  0
    2.5631   -0.3636    0.0000 C   0  0  0  0  0  0  0  0  0  0  0  0
    2.5176   -0.9846   -0.9006 H   0  0  0  0  0  0  0  0  0  0  0  0
    3.5041    0.1941    0.0000 H   0  0  0  0  0  0  0  0  0  0  0  0
    2.5176   -0.9846    0.9006 H   0  0  0  0  0  0  0  0  0  0  0  0
  1  2  1  0  0  0  0
  3  1  1  0  0  0  0
  4  3  2  0  0  0  0
  4  5  1  0  0  0  0
  6  8  2  0  0  0  0
  6  4  1  0  0  0  0
  7  6  1  0  0  0  0
  8  1  1  0  0  0  0
  9  8  1  0  0  0  0
  9 11  1  0  0  0  0
 10  9  1  0  0  0  0
 11 13  1  0  0  0  0
 11 14  1  0  0  0  0
 12 11  1  0  0  0  0
M  END
>  <MD_stabilization_energy>
-12.337

$$$$
/home/frits/DFT_14c/Syn027266/Syn027266.car
 OpenBabel02252016433D

 17 17  0  0  0  0  0  0  0  0999 V2000
   -1.0847   -0.7097    0.6462 N   0  0  0  0  0  0  0  0  0  0  0  0
   -0.6166   -1.4036    1.2185 H   0  0  0  0  0  0  0  0  0  0  0  0
   -2.3388   -0.7442    0.2824 C   0  0  0  0  0  0  0  0  0  0  0  0
   -3.0315   -1.5341    0.5396 H   0  0  0  0  0  0  0  0  0  0  0  0
   -2.6467    0.3028   -0.4286 N   0  0  0  0  0  0  0  0  0  0  0  0
   -1.5798    1.0126   -0.5147 C   0  0  0  0  0  0  0  0  0  0  0  0
   -1.5744    1.9486   -1.0564 H   0  0  0  0  0  0  0  0  0  0  0  0
   -0.5811    0.3808    0.1601 C   0  0  0  0  0  0  0  0  0  0  0  0
    0.7677    0.7631    0.3706 C   0  0  0  0  0  0  0  0  0  0  0  0
    0.9307    1.7431    0.8092 H   0  0  0  0  0  0  0  0  0  0  0  0
    1.8480    0.0182   -0.0267 C   0  0  0  0  0  0  0  0  0  0  0  0
    1.7594   -1.2121   -0.6473 N   0  0  0  0  0  0  0  0  0  0  0  0
    0.8621   -1.6469   -0.8447 H   0  0  0  0  0  0  0  0  0  0  0  0
    2.5824   -1.7362   -0.9329 H   0  0  0  0  0  0  0  0  0  0  0  0
    3.1270    0.4852    0.1784 N   0  0  0  0  0  0  0  0  0  0  0  0
    3.2973    1.3815    0.6267 H   0  0  0  0  0  0  0  0  0  0  0  0
    3.9500   -0.0399   -0.1058 H   0  0  0  0  0  0  0  0  0  0  0  0
  1  2  1  0  0  0  0
  3  4  1  0  0  0  0
  3  1  1  0  0  0  0
  5  3  2  0  0  0  0
  6  5  1  0  0  0  0
  6  8  2  0  0  0  0
  7  6  1  0  0  0  0
  8  9  1  0  0  0  0
  8  1  1  0  0  0  0
  9 10  1  0  0  0  0
 11 15  1  0  0  0  0
 11  9  1  0  0  0  0
 12 11  2  0  0  0  0
 13 12  1  0  0  0  0
 14 12  1  0  0  0  0
 15 16  1  0  0  0  0
 17 15  1  0  0  0  0
M  RAD  1   9   2
M  END
>  <MD_stabilization_energy>
-12.330

$$$$
/home/frits/DFT_14c/Syn045487/Syn045487.car
 OpenBabel02252016433D

 16 15  0  0  0  0  0  0  0  0999 V2000
   -0.2020    0.5895   -0.4188 N   0  0  0  0  0  0  0  0  0  0  0  0
   -0.1271    1.6044   -0.4272 H   0  0  0  0  0  0  0  0  0  0  0  0
    0.9843   -0.1479   -0.8243 C   0  0  0  0  0  0  0  0  0  0  0  0
    0.7030   -1.1320   -1.2104 H   0  0  0  0  0  0  0  0  0  0  0  0
    1.4644    0.4128   -1.6327 H   0  0  0  0  0  0  0  0  0  0  0  0
    1.8892   -0.3051    0.3543 C   0  0  0  0  0  0  0  0  0  0  0  0
    3.1091    0.2582    0.4307 C   0  0  0  0  0  0  0  0  0  0  0  0
    3.5009    0.8731   -0.3712 H   0  0  0  0  0  0  0  0  0  0  0  0
   -1.3849   -0.0115    0.0043 C   0  0  0  0  0  0  0  0  0  0  0  0
   -1.5245   -1.3794    0.0694 N   0  0  0  0  0  0  0  0  0  0  0  0
   -2.4560   -1.6573    0.4029 H   0  0  0  0  0  0  0  0  0  0  0  0
   -2.4118    0.8477    0.3611 N   0  0  0  0  0  0  0  0  0  0  0  0
   -3.3139    0.5095    0.6848 H   0  0  0  0  0  0  0  0  0  0  0  0
   -2.3263    1.8600    0.3211 H   0  0  0  0  0  0  0  0  0  0  0  0
    1.5460   -0.9186    1.1803 H   0  0  0  0  0  0  0  0  0  0  0  0
    3.7288    0.1055    1.3060 H   0  0  0  0  0  0  0  0  0  0  0  0
  1  9  1  0  0  0  0
  2  1  1  0  0  0  0
  3  1  1  0  0  0  0
  3  6  1  0  0  0  0
  4  3  1  0  0  0  0
  5  3  1  0  0  0  0
  6  7  2  0  0  0  0
  6 15  1  0  0  0  0
  7 16  1  0  0  0  0
  8  7  1  0  0  0  0
  9 10  2  0  0  0  0
  9 12  1  0  0  0  0
 10 11  1  0  0  0  0
 12 13  1  0  0  0  0
 14 12  1  0  0  0  0
M  END
>  <MD_stabilization_energy>
-12.184

$$$$
/home/frits/DFT_14c/Syn090202/Syn090202.car
 OpenBabel02252016433D

 16 16  0  0  0  0  0  0  0  0999 V2000
   -2.8120   -0.4837   -0.0000 N   0  0  0  0  0  0  0  0  0  0  0  0
   -3.5713    0.1916   -0.0000 H   0  0  0  0  0  0  0  0  0  0  0  0
   -3.0437   -1.4720   -0.0000 H   0  0  0  0  0  0  0  0  0  0  0  0
   -1.4955   -0.0888   -0.0000 C   0  0  0  0  0  0  0  0  0  0  0  0
   -0.5083   -0.9037    0.0000 N   0  0  0  0  0  0  0  0  0  0  0  0
    0.5827   -0.1721    0.0000 C   0  0  0  0  0  0  0  0  0  0  0  0
    0.2472    1.1107    0.0000 N   0  0  0  0  0  0  0  0  0  0  0  0
    0.8742    1.9067    0.0000 H   0  0  0  0  0  0  0  0  0  0  0  0
   -1.0392    1.1814    0.0000 C   0  0  0  0  0  0  0  0  0  0  0  0
   -1.5598    2.1295   -0.0000 H   0  0  0  0  0  0  0  0  0  0  0  0
    1.8575   -0.7057    0.0000 N   0  0  0  0  0  0  0  0  0  0  0  0
    1.8804   -1.7215    0.0000 H   0  0  0  0  0  0  0  0  0  0  0  0
    2.9939    0.0713   -0.0000 C   0  0  0  0  0  0  0  0  0  0  0  0
    3.0155    0.6944   -0.8999 H   0  0  0  0  0  0  0  0  0  0  0  0
    3.8659   -0.5891   -0.0000 H   0  0  0  0  0  0  0  0  0  0  0  0
    3.0155    0.6944    0.8998 H   0  0  0  0  0  0  0  0  0  0  0  0
  1  2  1  0  0  0  0
  1  4  1  0  0  0  0
  3  1  1  0  0  0  0
  4  9  2  0  0  0  0
  4  5  1  0  0  0  0
  5  6  2  0  0  0  0
  6 11  1  0  0  0  0
  7  6  1  0  0  0  0
  7  8  1  0  0  0  0
  9  7  1  0  0  0  0
 10  9  1  0  0  0  0
 12 11  1  0  0  0  0
 13 15  1  0  0  0  0
 13 11  1  0  0  0  0
 13 16  1  0  0  0  0
 14 13  1  0  0  0  0
M  END
>  <MD_stabilization_energy>
-12.065

$$$$
/home/frits/DFT_14c/Syn087003/Syn087003.car
 OpenBabel02252016433D

 15 15  0  0  0  0  0  0  0  0999 V2000
    3.3559   -0.0299   -0.0000 N   0  0  0  0  0  0  0  0  0  0  0  0
    4.0633   -0.7586   -0.0000 H   0  0  0  0  0  0  0  0  0  0  0  0
    3.6725    0.9356    0.0000 H   0  0  0  0  0  0  0  0  0  0  0  0
    2.0256   -0.3542   -0.0000 C   0  0  0  0  0  0  0  0  0  0  0  0
    1.8248   -1.4205   -0.0001 H   0  0  0  0  0  0  0  0  0  0  0  0
    1.0402    0.5780    0.0000 C   0  0  0  0  0  0  0  0  0  0  0  0
    1.2913    1.6340    0.0001 H   0  0  0  0  0  0  0  0  0  0  0  0
   -0.3282    0.2088    0.0000 C   0  0  0  0  0  0  0  0  0  0  0  0
   -1.3247    1.0632   -0.0000 N   0  0  0  0  0  0  0  0  0  0  0  0
   -1.2635    2.0750   -0.0000 H   0  0  0  0  0  0  0  0  0  0  0  0
   -2.4091    0.3693   -0.0000 C   0  0  0  0  0  0  0  0  0  0  0  0
   -3.3827    0.8393   -0.0000 H   0  0  0  0  0  0  0  0  0  0  0  0
   -2.0717   -0.9424    0.0000 C   0  0  0  0  0  0  0  0  0  0  0  0
   -2.6920   -1.8276    0.0000 H   0  0  0  0  0  0  0  0  0  0  0  0
   -0.7892   -1.0191    0.0000 N   0  0  0  0  0  0  0  0  0  0  0  0
  1  3  1  0  0  0  0
  2  1  1  0  0  0  0
  4  1  1  0  0  0  0
  4  6  2  0  0  0  0
  5  4  1  0  0  0  0
  6  7  1  0  0  0  0
  8 15  2  0  0  0  0
  8  6  1  0  0  0  0
  9  8  1  0  0  0  0
 10  9  1  0  0  0  0
 11  9  1  0  0  0  0
 11 13  2  0  0  0  0
 12 11  1  0  0  0  0
 13 14  1  0  0  0  0
 13 15  1  0  0  0  0
M  END
>  <MD_stabilization_energy>
-11.963

$$$$
/home/frits/DFT_14c/Syn087427/Syn087427.car
 OpenBabel02252016433D

 13 13  0  0  0  0  0  0  0  0999 V2000
    2.2820    5.3315    5.9286 N   0  0  0  0  0  0  0  0  0  0  0  0
    1.2690    5.4169    5.9250 H   0  0  0  0  0  0  0  0  0  0  0  0
    2.7730    5.5092    6.7992 H   0  0  0  0  0  0  0  0  0  0  0  0
    2.9868    4.9859    4.7959 C   0  0  0  0  0  0  0  0  0  0  0  0
    4.2840    4.8788    4.8093 N   0  0  0  0  0  0  0  0  0  0  0  0
    4.9840    5.0015    5.5325 H   0  0  0  0  0  0  0  0  0  0  0  0
    4.6408    4.5297    3.5449 N   0  0  0  0  0  0  0  0  0  0  0  0
    3.5207    4.4597    2.8888 C   0  0  0  0  0  0  0  0  0  0  0  0
    2.4010    4.7346    3.6008 C   0  0  0  0  0  0  0  0  0  0  0  0
    1.3603    4.7488    3.3053 H   0  0  0  0  0  0  0  0  0  0  0  0
    3.5132    4.1241    1.5549 N   0  0  0  0  0  0  0  0  0  0  0  0
    4.3892    3.9298    1.0801 H   0  0  0  0  0  0  0  0  0  0  0  0
    2.6511    4.0627    1.0203 H   0  0  0  0  0  0  0  0  0  0  0  0
  1  3  1  0  0  0  0
  2  1  1  0  0  0  0
  4  5  1  0  0  0  0
  4  1  1  0  0  0  0
  5  6  1  0  0  0  0
  7  5  1  0  0  0  0
  8  7  2  0  0  0  0
  8  9  1  0  0  0  0
  9  4  2  0  0  0  0
 10  9  1  0  0  0  0
 11  8  1  0  0  0  0
 12 11  1  0  0  0  0
 13 11  1  0  0  0  0
M  END
>  <MD_stabilization_energy>
-11.959

$$$$
